# Supplementary material for: One-pot synthesis of large scale graphene nanosheets from graphite–liquid crystal composite via thermal treatment
Source: Royal Society of Chemistry journal article supplement (doi:10.1039/c2jm13929d), 2012-01-01
Supplement: c2jm13929d.pdf [file c2jm13929d.pdf]

## Supporting Information

# One-Pot Synthesis of Large Scale Graphene Nanosheets from Graphite-Liquid Crystal Composite via Thermal Treatment

Afsaneh Safavi\*, Maryam Tohidi, Farzaneh Aghakhani Mahyari, Hamidreza Shahbaazi

Department of Chemistry, College of Sciences, Shiraz University, Shiraz, 71454, Iran.

AUTHOR EMAIL ADDRESS: [safavi@chem.susc.ac.ir](mailto:safavi@chem.susc.ac.ir)

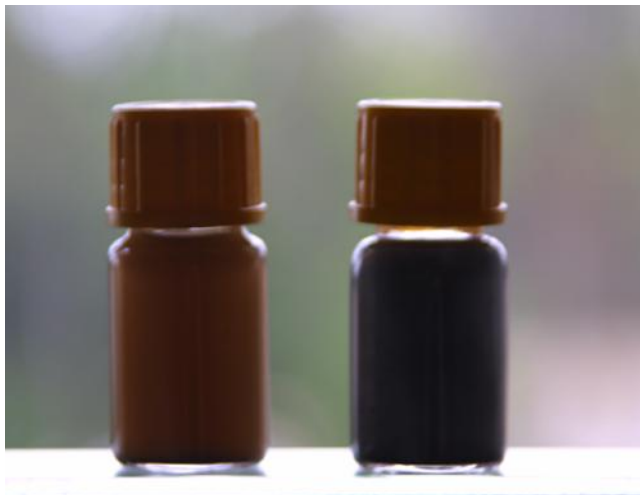

**Figure S1.** Optical images of a GOx (left image) and GNSs (right image) suspension in water.

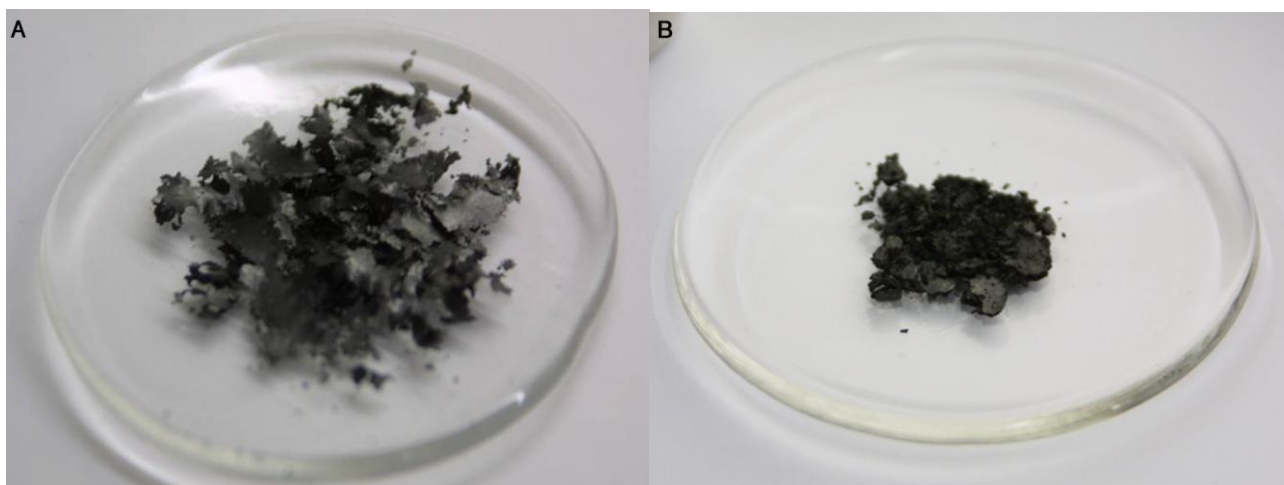

**Figure S2.** Photomicrographs of (A) flake like graphite-ILC composite (30/70 w/w graphite/ILC) as starting material and (B) large scale synthesized GNSs.

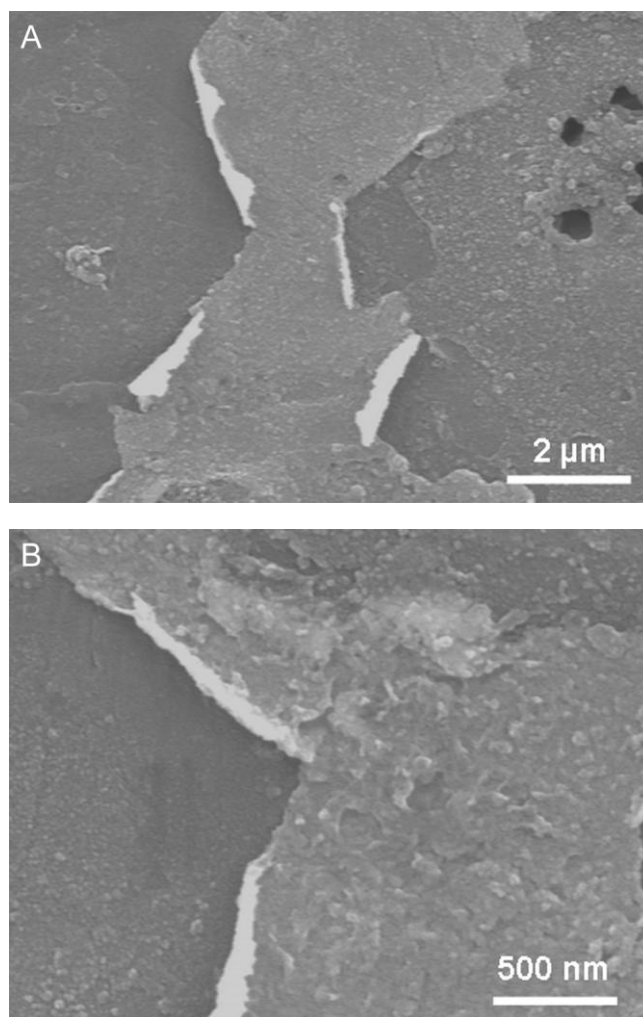

**Figure S3.** FESEM images of flake like graphite-ILC composite (30/70 w/w graphite/ILC) at (A) low magnification and (B) high magnification.

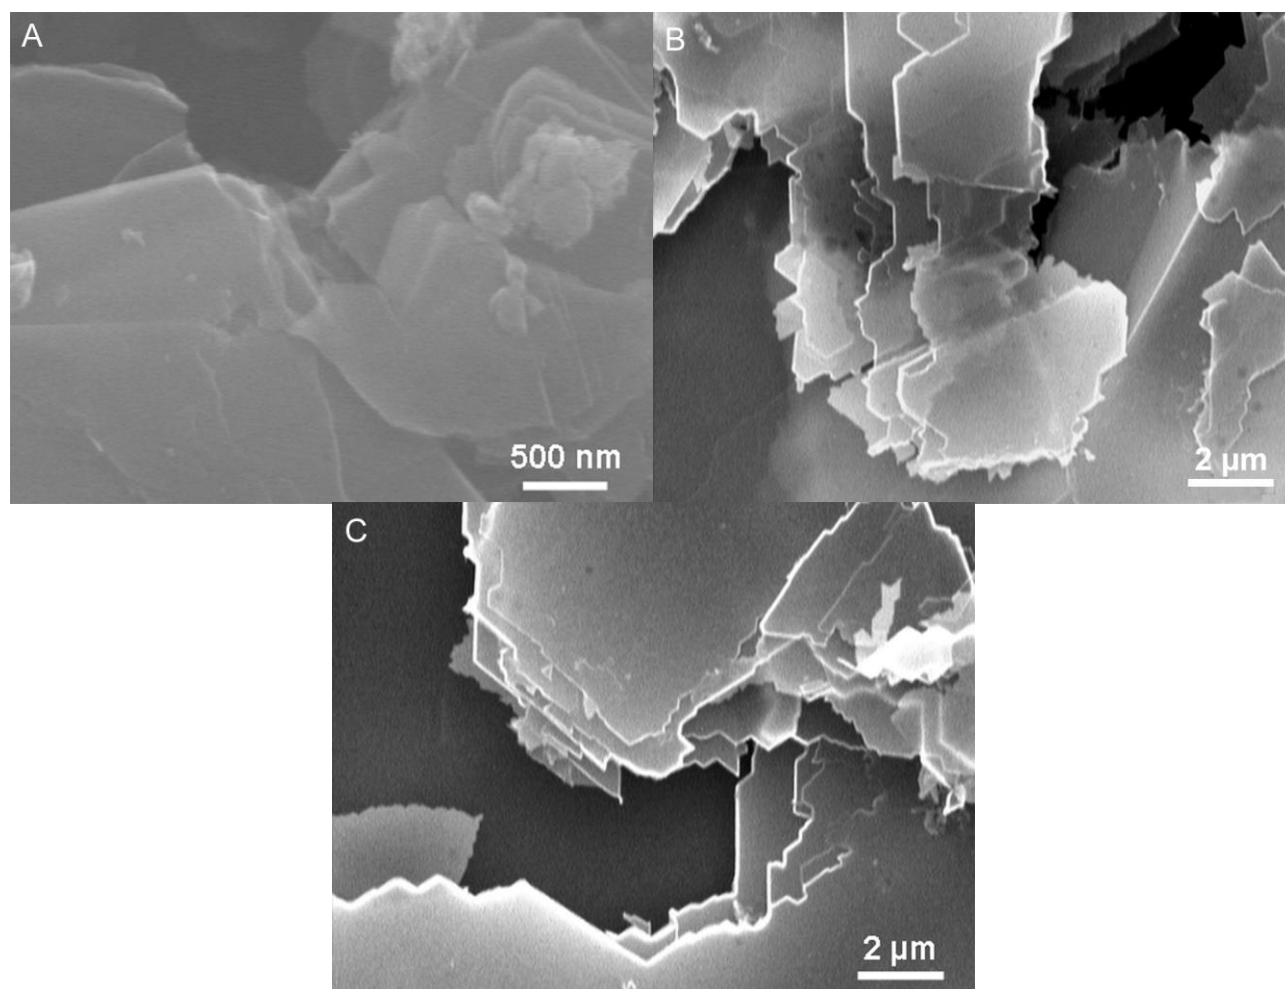

**Figure S4.** FESEM and SEM images of the produced GNSs at different magnification. The synthesis condition: thermal treatment of graphite-ILC composite with ratio of 70/30 (w/w).

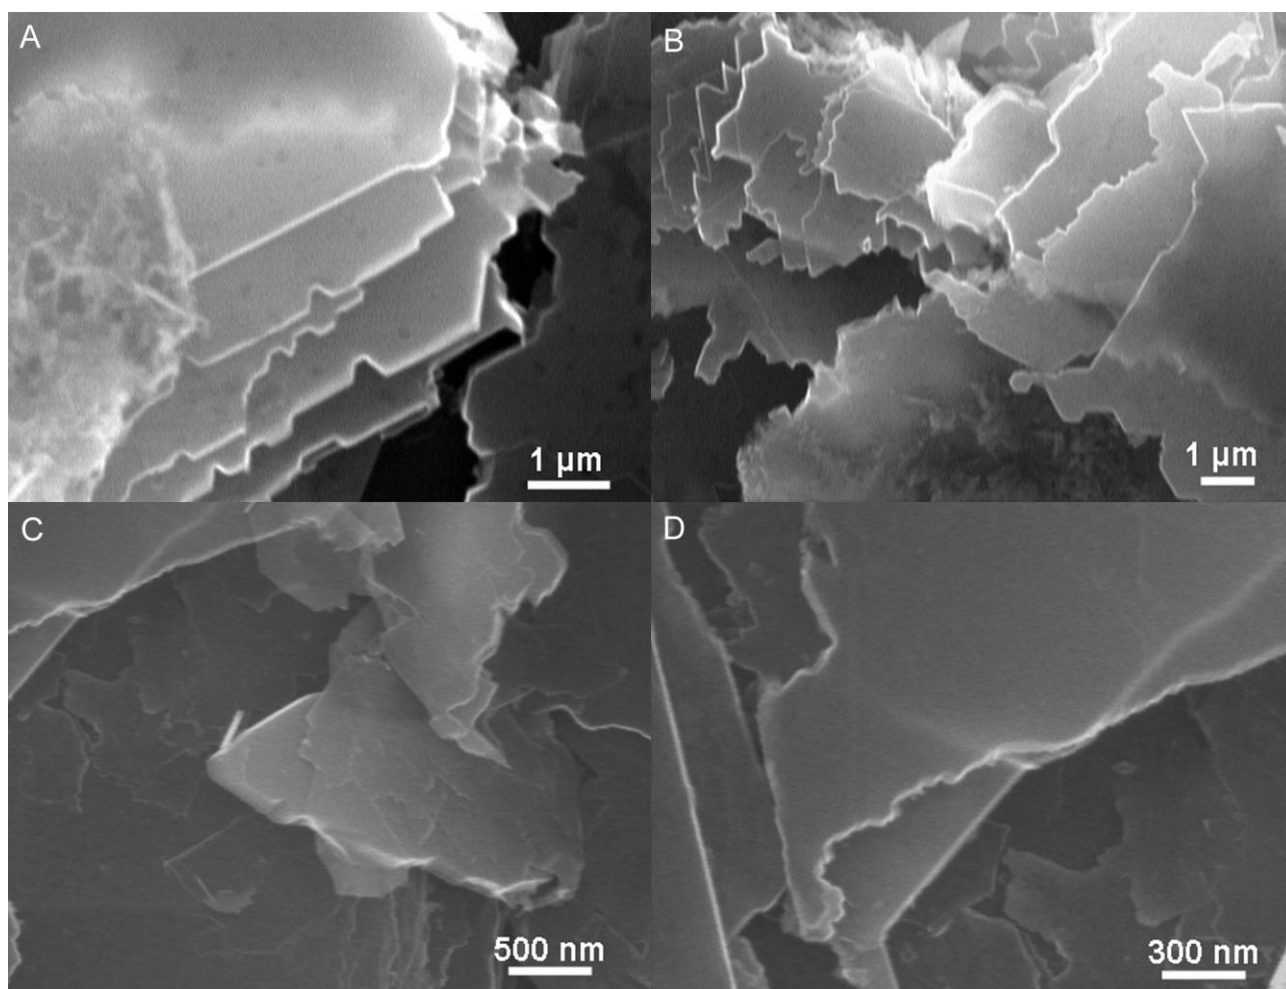

**Figure S5.** FESEM and SEM images of the produced GNSs at different magnification. The synthesis condition: thermal treatment of graphite-ILC composite with ratio of 50/50 (w/w).

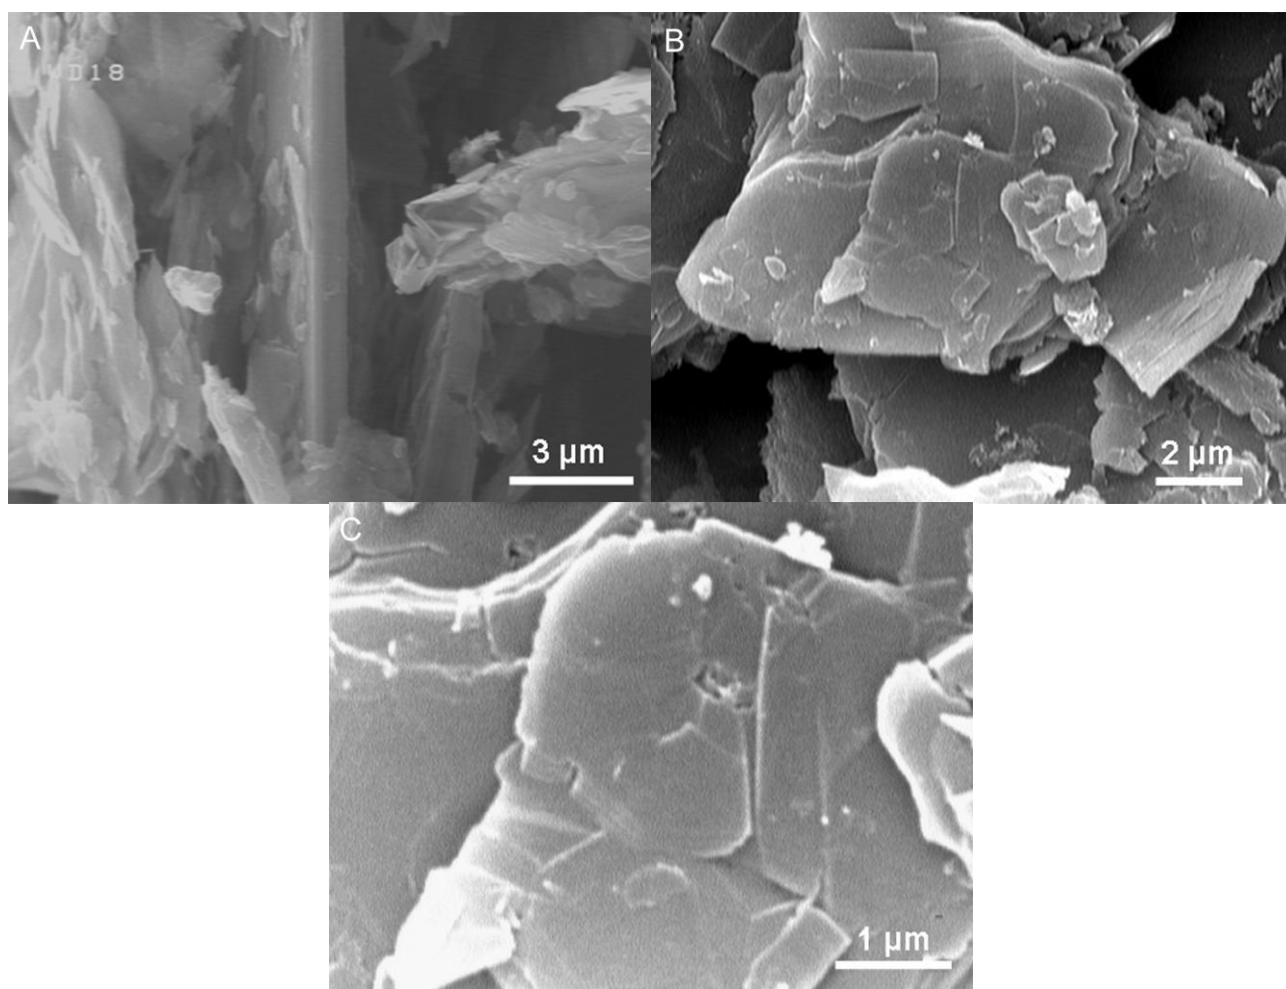

**Figure S6.** FESEM and SEM images of the natural graphite at different magnification.



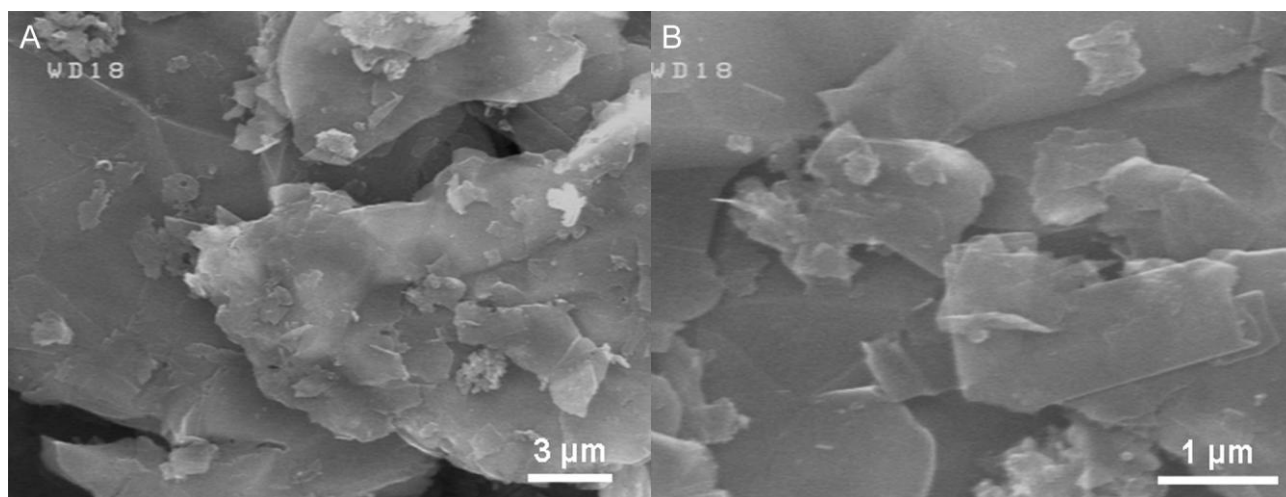

**Figure S7.** FESEM images of the blank sample at different magnification. The synthesis condition: thermal treatment of natural graphite.



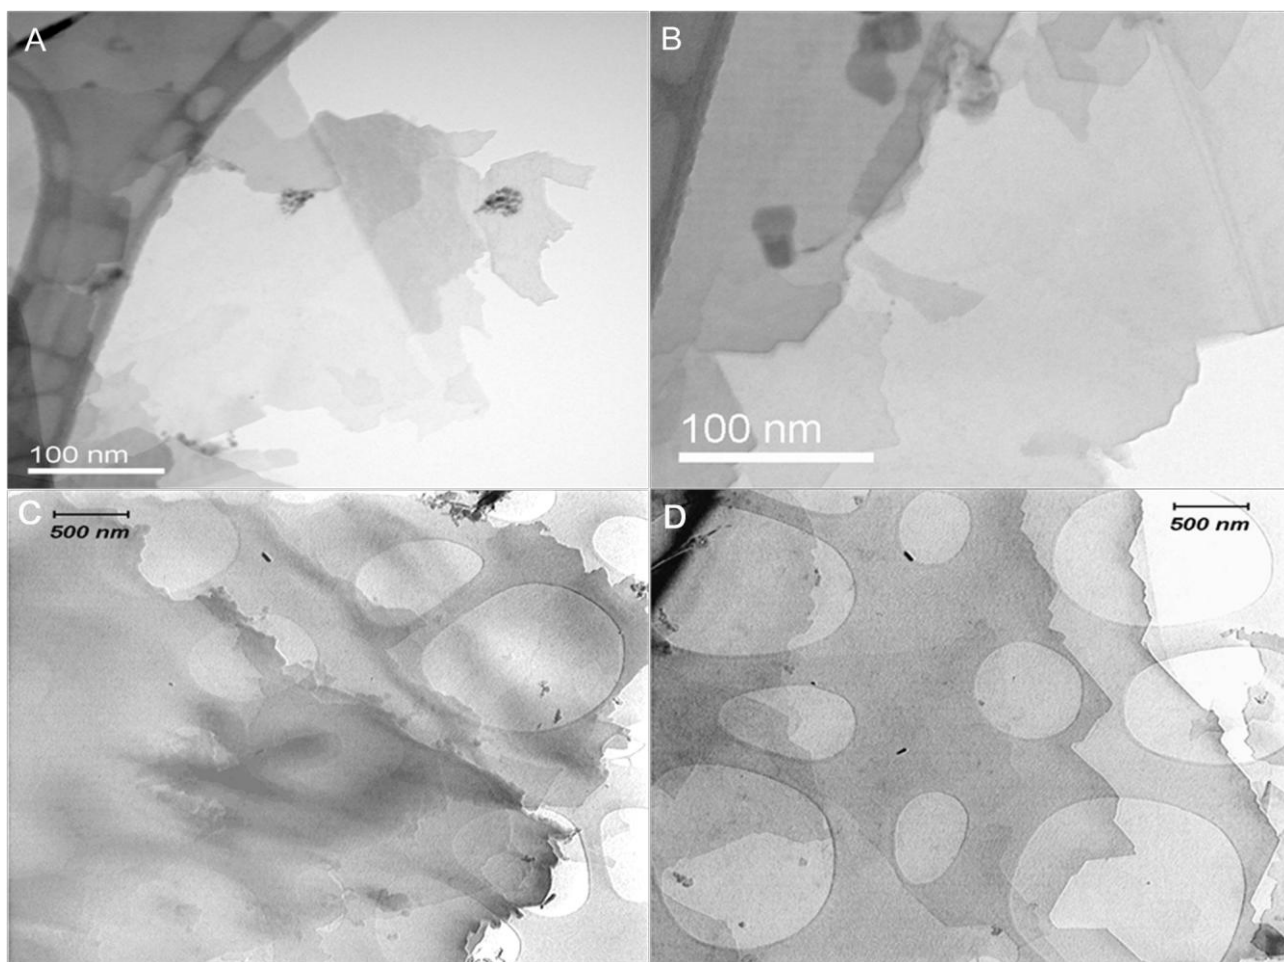

**Figure S8.** HR-TEM (A-B) and TEM (C-D) images of the produced GNSs with thermal treatment of graphite-ILC composite with ratios of (A)-(B) 30/70 (w/w) and (C)-(D) 50/50 (w/w).

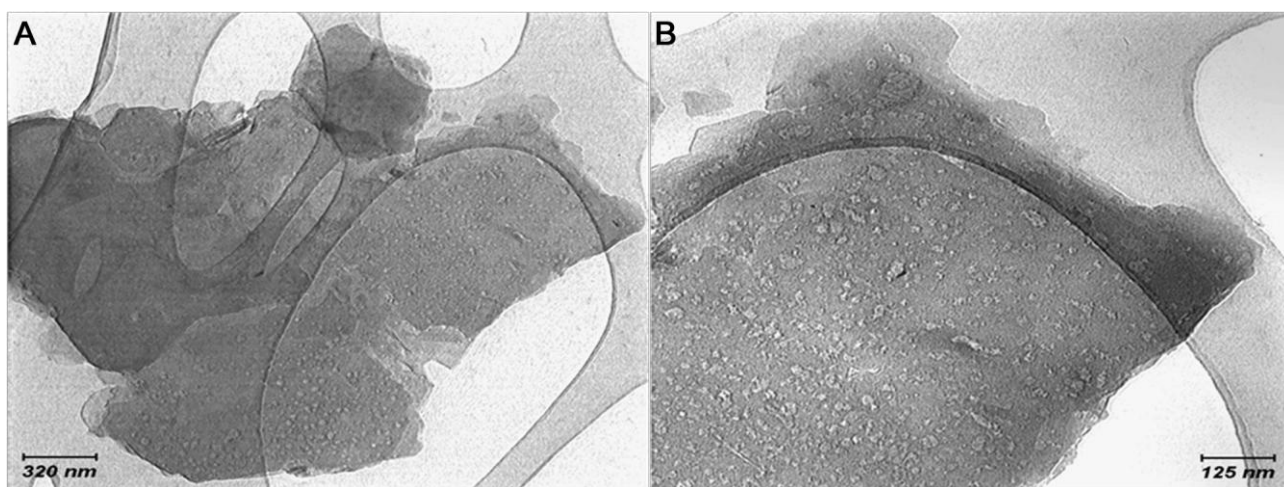

**Figure S9.** TEM images of flake like graphite-ILC composite (30/70 w/w graphite/ILC) at (A) low magnification and (B) high magnification.

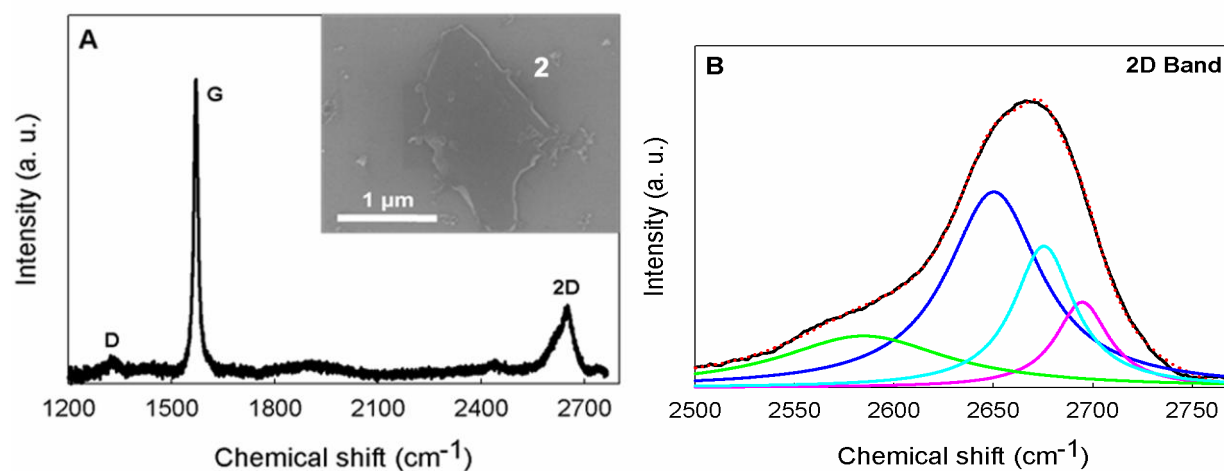

**Figure S10.** (A) Raman spectra of bi-layers GNS. Inset: magnified SEM images of sheets 2 in Figure 3a and (B) Deconvolution of the 2D band of Raman spectra for sheet 2 in Figure 3a to Lorentzian curves.
